# Supplementary material for: A solution-processed silicon oxide gate dielectric prepared at a low temperature via ultraviolet irradiation for metal oxide transistors
Source: Royal Society of Chemistry journal article supplement (doi:10.1039/c6tc03725a), 2016-01-01
Supplement: c6tc03725a1.pdf [file c6tc03725a1.pdf]

## Supporting Information

### Solution-Processed Silicon Oxide Gate Dielectric Prepared at Low Temperature via Ultraviolet Irradiation for Indium Zinc Oxide Transistors

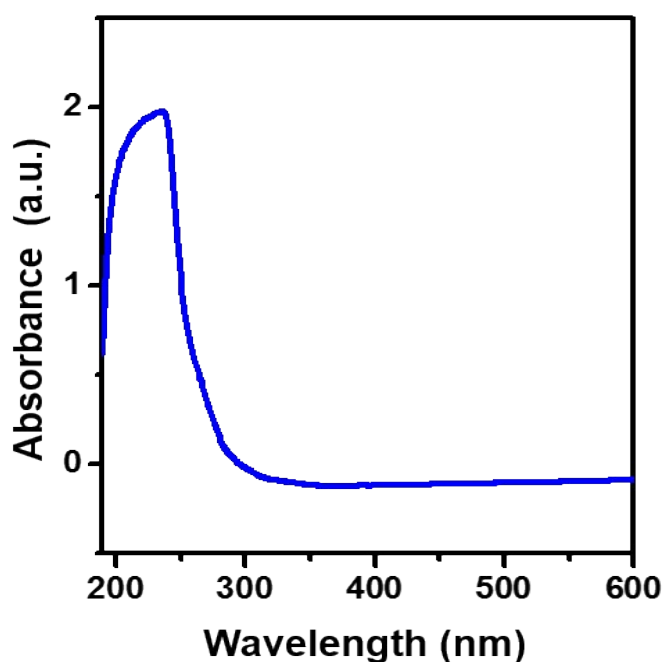

**Figure S1.** Light absorption characteristics of the perhydropolysilazane (PHPS) solution ink with VTES coupling agent.

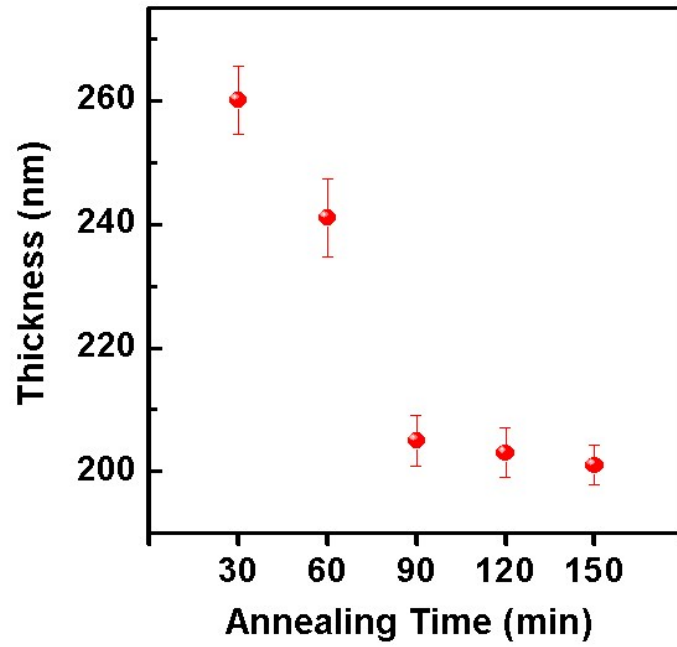

**Figure S2.** Variation in DUV-annealed SiO<sub>2</sub> film thickness as a function of photon irradiation time.

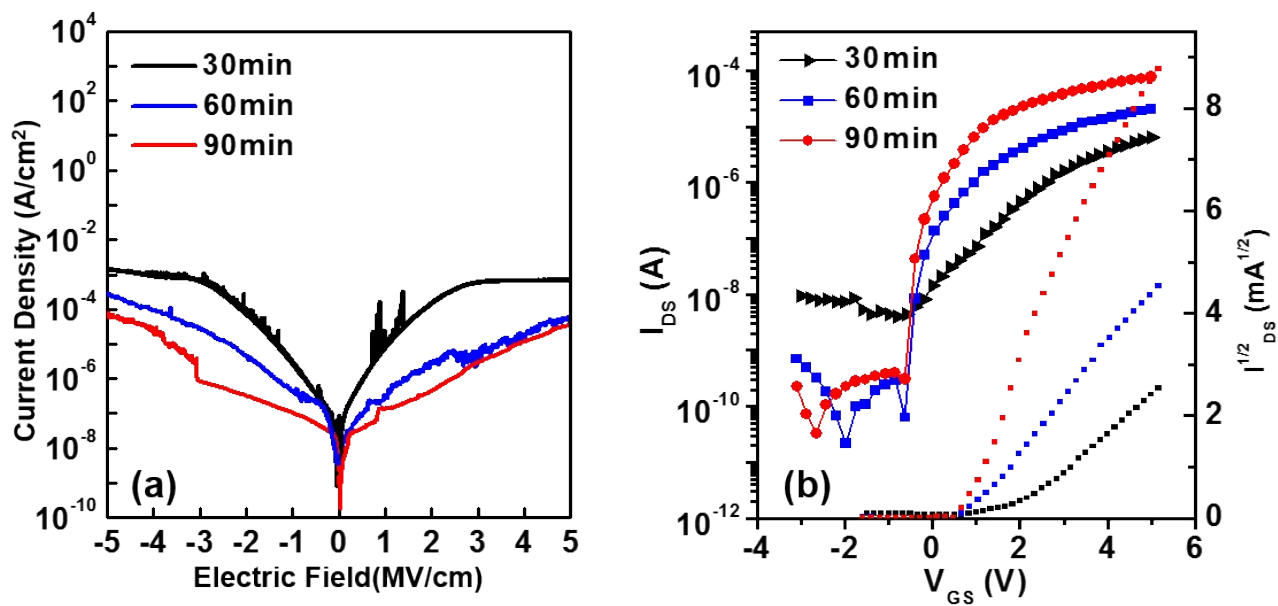

**Figure S3.** Electrical properties of TFTs with solution-processed, DUV-annealed SiO<sub>2</sub> gate insulators as a function of photon irradiation time: (a) gate leakage current and (b) transfer characteristics.

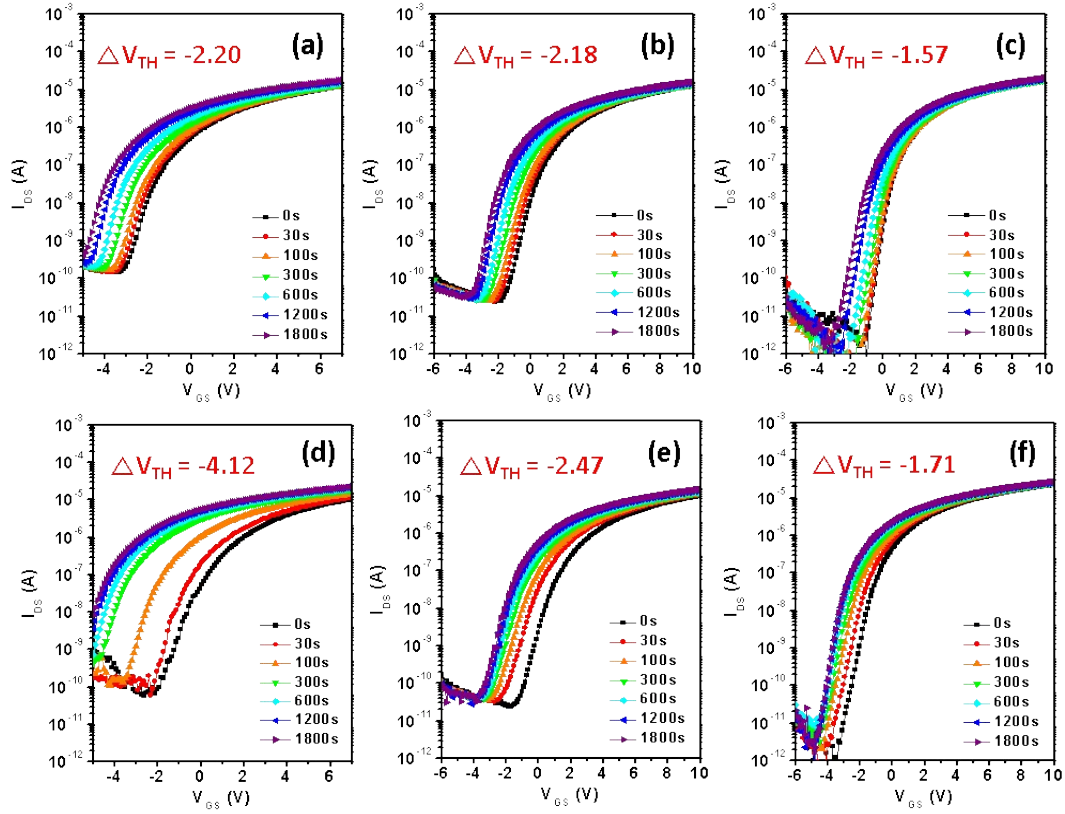

**Figure S4.** Variations in the transfer characteristics for the IZO TFTs with the SiO<sub>2</sub> gate insulator annealed at (a) 150 °C, (b) 250 °C and (c) DUV condition as a function of NBS time. The devices were stressed under the following conditions: V<sub>GS</sub> at -5 V at room temperature. The V<sub>DS</sub> was fixed to 1V and the NBS duration was 1,800 s. Evolution of the transfer characteristics for the IZO TFTs with the SiO<sub>2</sub> gate insulator annealed at (d) 150 °C, (e) 250 °C and (f) DUV condition as a function of NBIS time. The NBS condition for NBIS instability was identical to the NBS except for light irradiation. The green LED was used as a light source whether the light intensity was 75 μW/cm<sup>2</sup>.
